# Supplementary material for: Diamond photo-electric detectors with introduced silicon-vacancy color centers
Source: Royal Society of Chemistry journal article supplement (doi:10.1039/d4tc02335h), 2024-01-01
Supplement: d4tc02335h1.pdf [file d4tc02335h1.pdf]

## Supplementary Materials

### **Diamond photo-electric detectors with introducing silicon-vacancy color centers**

Xiaokun Guo<sup>1,2</sup>, Bing Yang<sup>1,2,\*</sup>, Xinglai Zhang<sup>1,2</sup>, Jiaqi Lu<sup>1,2</sup>, Ming Huang<sup>1,3</sup>, Nan Huang<sup>1,2</sup>, Lusheng Liu<sup>1,2</sup> and Xin Jiang<sup>4,\*</sup>

<sup>1</sup> *Shenyang National Laboratory for Materials Science (SYNL), Institute of Metal Research (IMR), Chinese Academy of Sciences (CAS), No. 72 Wenhua Road, Shenyang 110016, China;*

<sup>2</sup> *School of Materials Science and Engineering, University of Science and Technology of China, No. 72 Wenhua Road, Shenyang 110016, China;*

<sup>3</sup> *School of Environment and Chemical Engineering, Shenyang University of Technology, Shenliao West Road 111, Economic & Technological Development Zone 110870 Shenyang, China;*

<sup>4</sup> *Institute of Materials Engineering, University of Siegen, No. 9-11 Paul-Bonatz-Str., 57076 Siegen, Germany;*

\* Correspondence: [byang@imr.ac.cn](mailto:byang@imr.ac.cn) (B.Y.); [xjiang@imr.ac.cn](mailto:xjiang@imr.ac.cn) (X.J.)

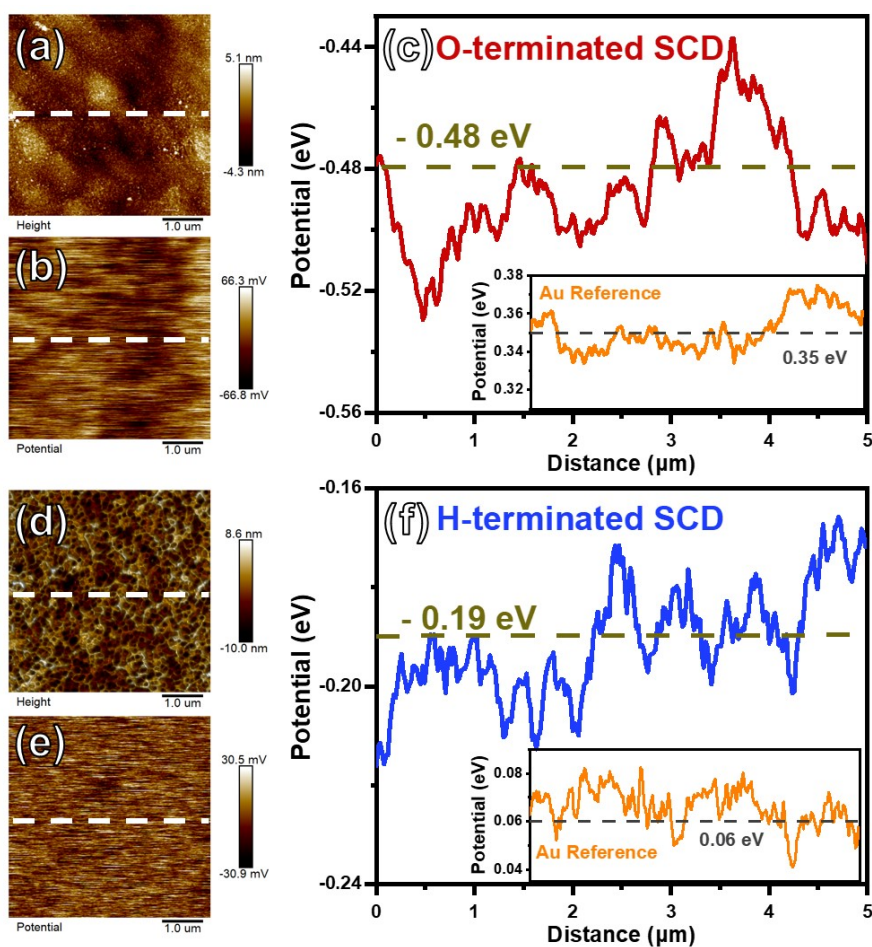

Fig. S1 AFM images of the O-SCD (a) and the H-SCD (d). Corresponding KPFM surface potential maps of the O-SCD (b) and the H-SCD (e). Plots of the surface potential of the O-SCD (c) and the H-SCD (f) were measured along the white dash lines depicted in panels. The work functions of SCDs can be calculated by  $\Phi_{SCD} = \Phi_{Au} + V_{SCD} - V_{Au}$ , where  $\Phi_{Au}$  is work function of gold reference (5.1 eV),  $V$  is contact potential difference (CPD) depicted in figure (c) and (f). The work functions of O-SCD ( $\Phi_{O-SCD}$ ) and H-SCD ( $\Phi_{H-SCD}$ ) are estimated to be 4.27 eV and 4.85 eV, respectively.

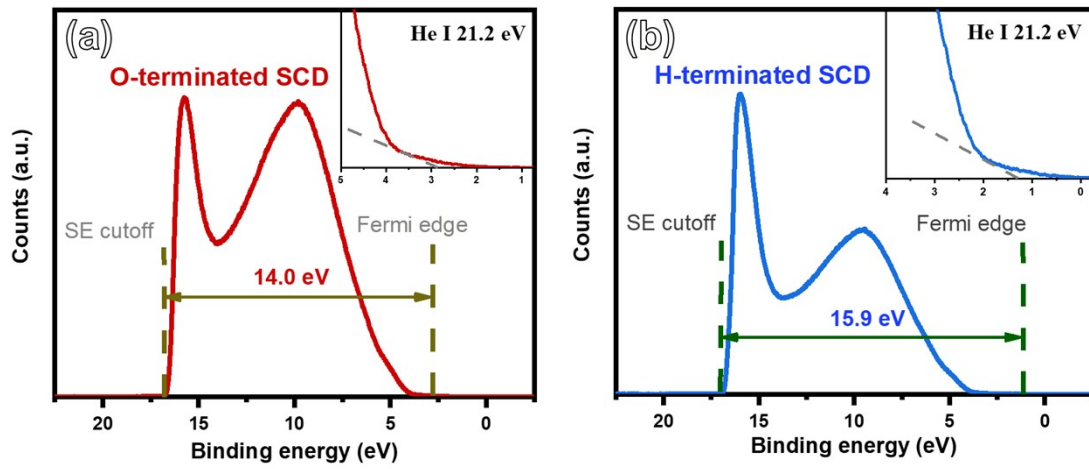

Fig. S2 UPS spectra of the O-Dia (a) and the H-Dia (b) excited by He I photons ( $h\nu = 21.2$  eV). The energy difference between vacuum level ( $E_{VAC}$ ) and valence band maximum ( $E_V$ ) can be deduced by  $E_{VAC} - E_V = h\nu - W$ , here the  $W$  is electron band width that equals the distance between the second electron (SE) cutoff edge and Fermi edge.<sup>1,2</sup> Electron affinities ( $\chi$ ) can be further derived by:  $\chi = E_{VAC} - E_C = E_{VAC} - E_V - E_g$ , where the  $E_C$  is conduction band minimum and the  $E_g$  is band gap of diamond (5.47 eV). The  $\chi_{O-Dia}$  and  $\chi_{H-Dia}$  are estimated to be 1.73 eV and -0.17 eV, respectively.

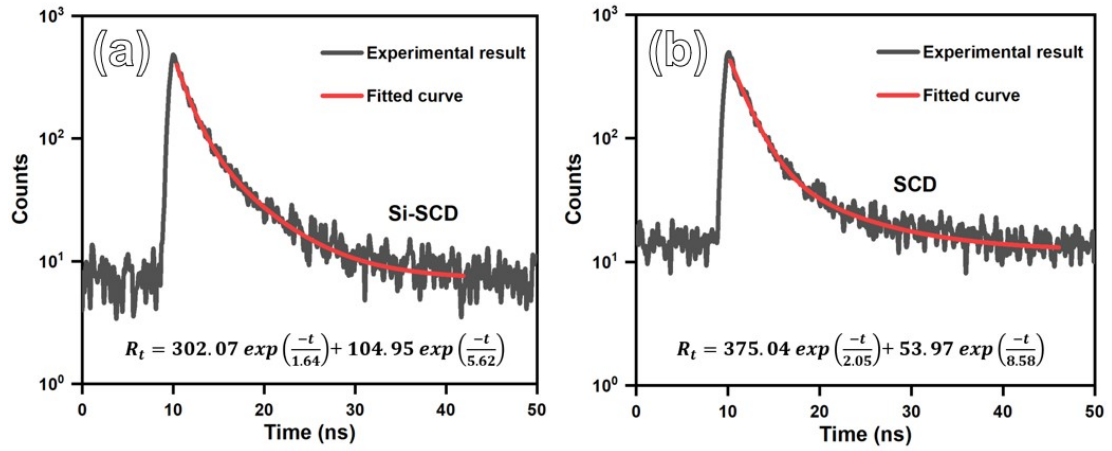

Fig. S3 The TRPL spectra of the Si-SCD (a) and SCD samples. The fitting function of the bi-exponential decay is  $R_t = A_1 \exp(-t/\tau_1) + A_2 \exp(-t/\tau_2)$ . The average lifetime can be calculated using  $\tau_{ave} = (A_1 \tau_1^2 + A_2 \tau_2^2) / (A_1 \tau_1 + A_2 \tau_2)$ . The result show that the  $\tau_{ave}$  of the Si-SCD and SCD is 3.80 ns and 4.50 ns, respectively, indicating a shorter lifetime of photoinduced carriers in Si doped sample. Hence, the defect density in Si-SCD should be higher than the SCD sample, which also act as trapping center and lead to a longer response time of photo-electrical signals.

Tab. S1 Power densities of light sources with different wavelengths measured using a photometer with a window area of 1 cm<sup>2</sup>.

| Wavelength (nm)             | 220   | 254   | 365   | 400   | 450   | 532   | 650   |
|-----------------------------|-------|-------|-------|-------|-------|-------|-------|
| Power (mW/cm <sup>2</sup> ) | 0.330 | 0.087 | 0.134 | 0.238 | 0.307 | 0.250 | 0.157 |

Tab. S2 Photocurrents and responsivities of the Si-SCD and the SCD devices under illuminations of different wavelengths (15V bias)

| Wavelength (nm) | 220                   | 254                    | 365                    | 400                    | 450                    | 532                    | 650                    |
|-----------------|-----------------------|------------------------|------------------------|------------------------|------------------------|------------------------|------------------------|
| <b>Si-SCD</b>   |                       |                        |                        |                        |                        |                        |                        |
| $I_{ph}$ (A)    | $3.58 \times 10^{-8}$ | $2.37 \times 10^{-10}$ | $1.24 \times 10^{-10}$ | $1.84 \times 10^{-10}$ | $7.03 \times 10^{-11}$ | $3.72 \times 10^{-11}$ | $2.68 \times 10^{-11}$ |
| $I_{net}$ (A)   | $3.58 \times 10^{-8}$ | $2.31 \times 10^{-10}$ | $1.18 \times 10^{-10}$ | $1.84 \times 10^{-10}$ | $6.46 \times 10^{-11}$ | $3.15 \times 10^{-11}$ | $2.11 \times 10^{-11}$ |
| R (A/W)         | $3.62 \times 10^{-2}$ | $8.85 \times 10^{-4}$  | $2.94 \times 10^{-4}$  | $2.57 \times 10^{-4}$  | $7.01 \times 10^{-5}$  | $4.96 \times 10^{-5}$  | $4.47 \times 10^{-5}$  |
| <b>SCD</b>      |                       |                        |                        |                        |                        |                        |                        |
| $I_{ph}$ (A)    | $4.63 \times 10^{-8}$ | $2.83 \times 10^{-12}$ | $2.49 \times 10^{-12}$ | $1.86 \times 10^{-12}$ | $1.77 \times 10^{-12}$ | $1.72 \times 10^{-12}$ | $1.74 \times 10^{-12}$ |
| $I_{net}$ (A)   | $4.63 \times 10^{-8}$ | $0.71 \times 10^{-12}$ | $0.89 \times 10^{-12}$ | $0.24 \times 10^{-12}$ | $0.17 \times 10^{-12}$ | $0.12 \times 10^{-12}$ | $0.14 \times 10^{-12}$ |
| R (A/W)         | $4.68 \times 10^{-2}$ | $2.72 \times 10^{-6}$  | $2.21 \times 10^{-6}$  | $5.97 \times 10^{-7}$  | $1.85 \times 10^{-7}$  | $1.60 \times 10^{-7}$  | $2.97 \times 10^{-7}$  |

## References

- [1] Liu Z Q, Chim W K, Chiam S Y, et al. An interface dipole predictive model for high-k dielectric/semiconductor heterostructures using the concept of the dipole neutrality point. Journal of Materials Chemistry, 2012, 22(34): 17887-17892.
- [2] Diederich L, Küttel O M, Aebi P, et al. Electron affinity and work function of differently oriented and doped diamond surfaces determined by photoelectron spectroscopy. Surface science, 1998, 418(1): 219-239..
